# Supplementary material for: Ru-based nanoparticles supported on carbon nanotubes for electrocatalytic hydrogen evolution: structural and electronic effects
Source: Royal Society of Chemistry journal article supplement (doi:10.1039/d3qi00698k), 2023-01-01
Supplement: d3qi00698k1.pdf [file d3qi00698k1.pdf]

## SUPPLEMENTARY MATERIAL

### **Ru-based nanoparticles supported on carbon nanotubes for electrocatalytic hydrogen evolution: structural and electronic effects**

Nuria Romero,<sup>a,b\*,&</sup> Dídac A. Fenoll,<sup>a,&</sup> Laia Gil,<sup>a</sup> Sergi Campos,<sup>a</sup> Jordi Creus,<sup>a,b</sup> Gerard Martí,<sup>a</sup> Javier Heras-Domingo,<sup>a</sup> Vincent Collière,<sup>b</sup> Camilo A. Mesa,<sup>c</sup> Sixto Giménez,<sup>c</sup> Laia Francàs,<sup>a</sup> Luis Rodríguez-Santiago,<sup>a</sup> Xavier Solans-Monfort,<sup>a\*</sup> Mariona Sodupe,<sup>a</sup> Roger Bofill,<sup>a</sup> Karine Philippot,<sup>b\*</sup> Jordi García-Antón,<sup>a</sup> and Xavier Sala<sup>a\*</sup>

<sup>a</sup> Departament de Química, Universitat Autònoma de Barcelona, 08193 Bellaterra (Cerdanyola del Vallès), Catalonia (Spain). E-mail: [xavier.sala@uab.cat](mailto:xavier.sala@uab.cat), [xavier.solans@uab.cat](mailto:xavier.solans@uab.cat)

<sup>b</sup> CNRS, LCC (Laboratoire de Chimie de Coordination), UPR8241, Université de Toulouse, UPS, INPT, F-31077 Toulouse cedex 4, France. E-mail: [nuria.romero@lcc-toulouse.fr](mailto:nuria.romero@lcc-toulouse.fr), [karine.philippot@lcc-toulouse.fr](mailto:karine.philippot@lcc-toulouse.fr)

<sup>c</sup> Institute of Advanced Materials (INAM), Universitat Jaume I, Avenida de Vicente Sos Baynat, s/n, 12006 12006 Castelló de la Plana, Castellón, Spain.

\* Corresponding authors

& These authors contributed equally to this work.

## List of Contents

page

|                                                                     |    |
|---------------------------------------------------------------------|----|
| 1. Electron microscopy characterization of the hybrid nanomaterials | 3  |
| 2. HER catalytic studies of the hybrid nanomaterials                | 7  |
| 3. Computational studies                                            | 11 |

# 1. Electron microscopy characterization of the hybrid nanomaterials

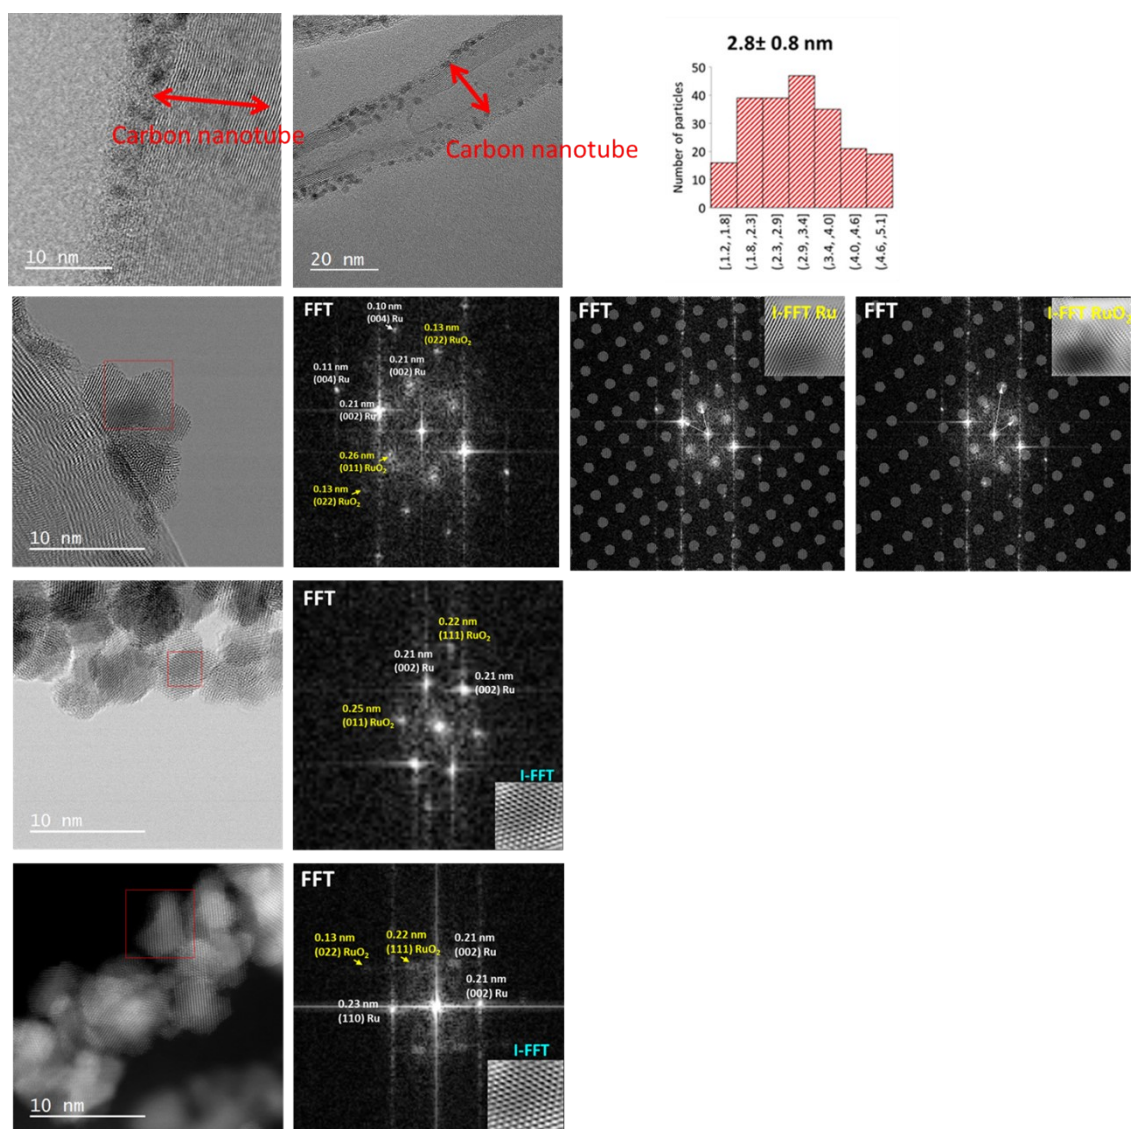

**Figure S1.** HRTEM images and size histogram of the Ru@RuO<sub>2</sub>/CNT nanomaterial, including electron diffraction patterns after Fast Fourier Transform treatment of individual nanoparticles (on a holey carbon covered Cu grid).

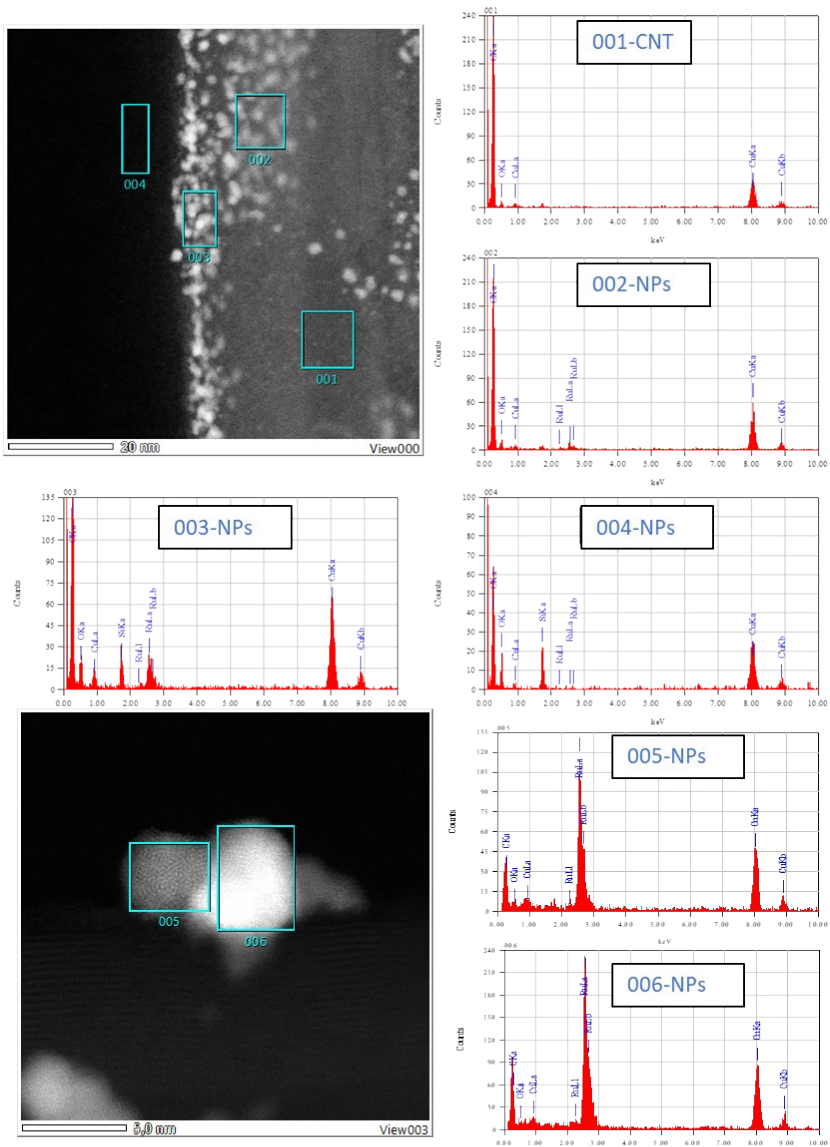

**Figure S2.** EDX spectra on different regions of HRTEM images of Ru@RuO<sub>2</sub>/CNT: general EDX analysis (top) and nanoparticle analysis (bottom, holy carbon covered Cu grid).

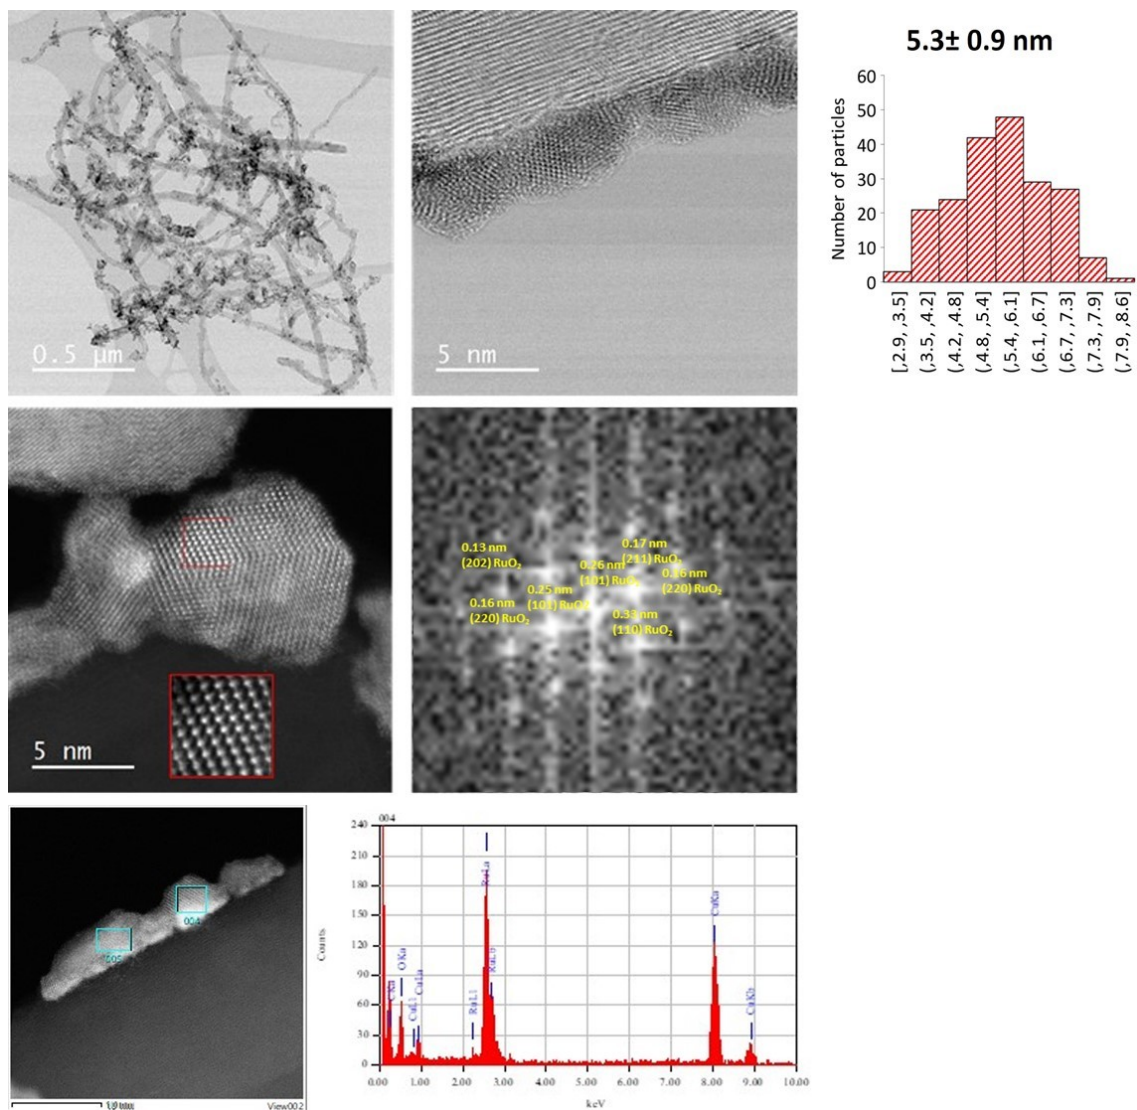

**Figure S3.** TEM and HRTEM images, NPs size histogram, FFT pattern and EDX analysis of the RuO<sub>2</sub>-10'/CNT nanomaterial.

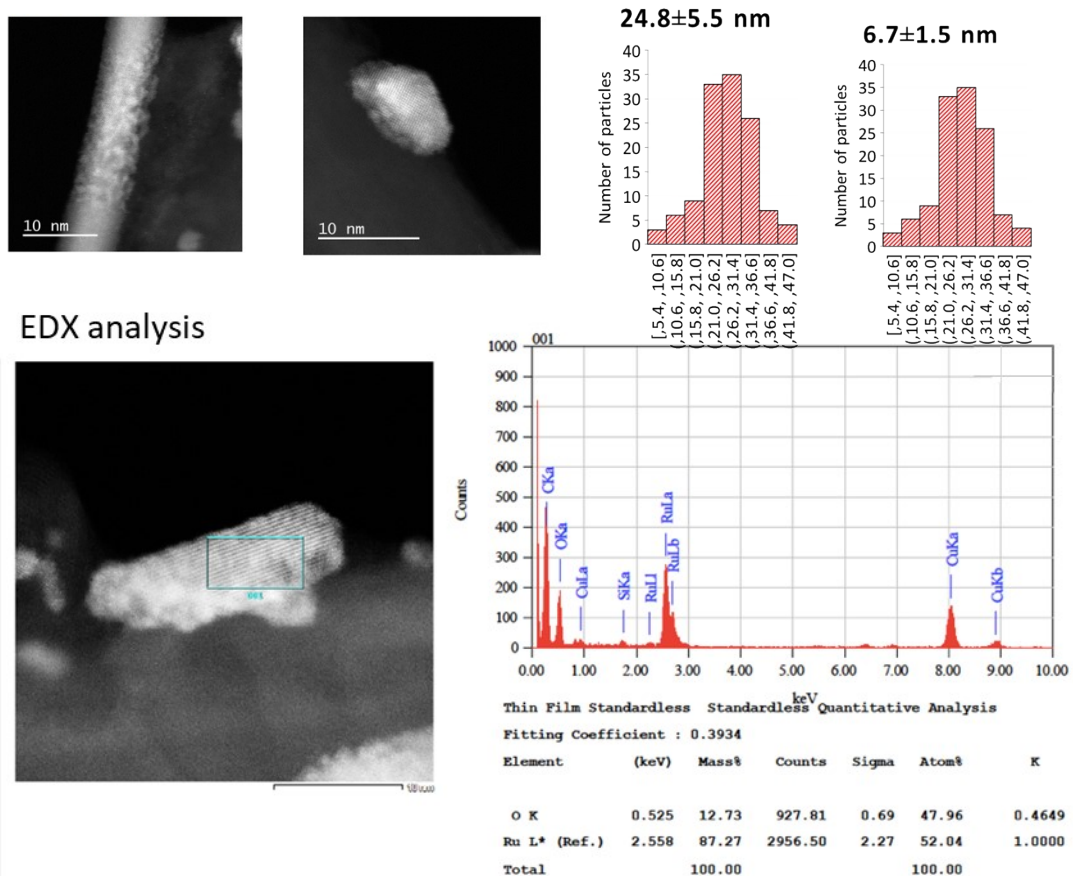

**Figure S4.** TEM and HRTEM images, NPs size histogram and EDX analysis of the **RuO<sub>2</sub>-120'/CNT** nanomaterial.

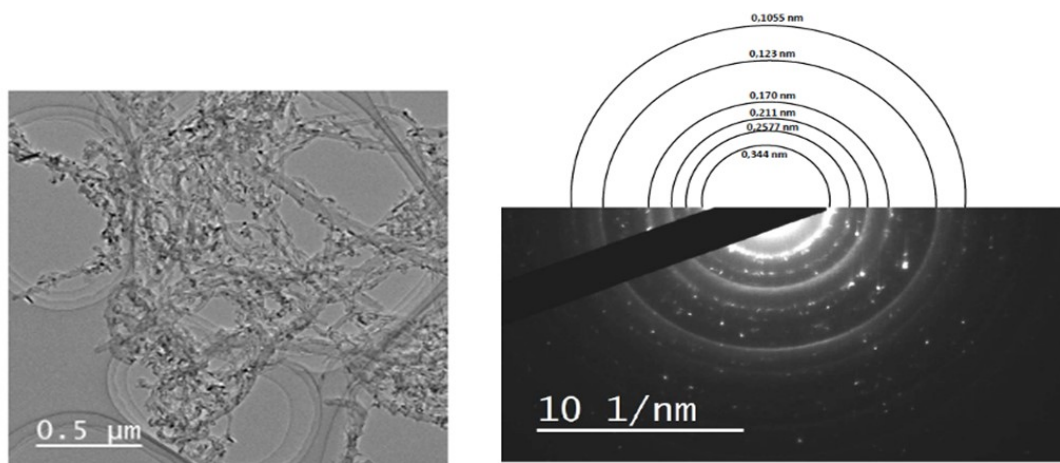

**Figure S5.** Electron diffraction analysis of a large zone of the **RuO<sub>2</sub>-120'/CNT** nanomaterial.

## 2. HER catalytic studies of the hybrid nanomaterials

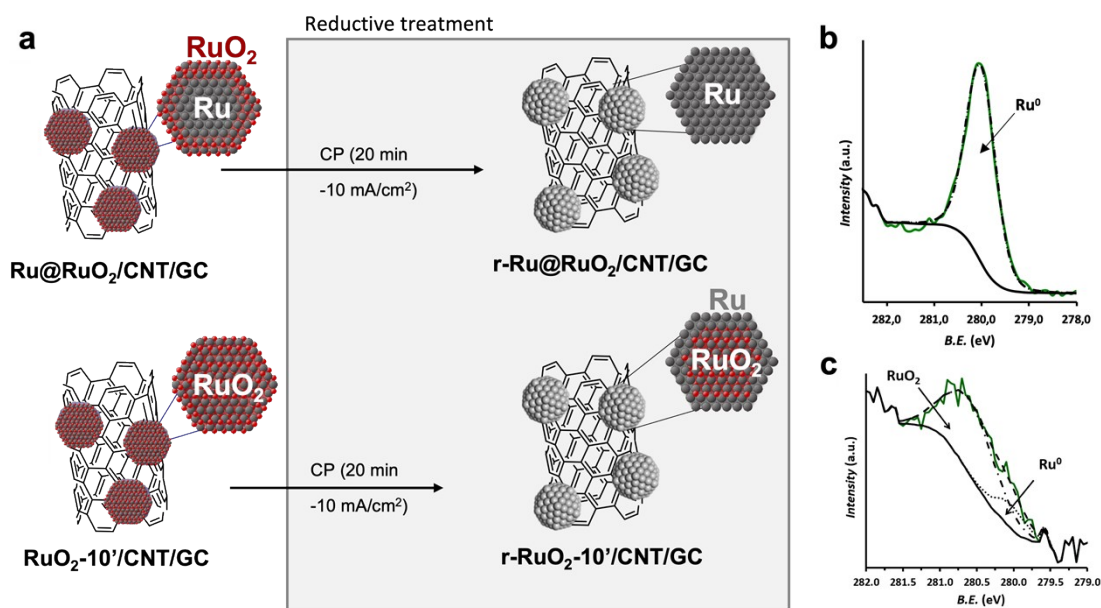

**Figure S6.** (a) Scheme of the chronopotentiometry reductive treatment applied to the GC RDE deposited nanomaterials, leading to their reduced counterparts. (b) XPS spectrum of **r-Ru@RuO<sub>2</sub>/CNT/GC** and (c) XPS spectrum of **r-RuO<sub>2</sub>-10'/CNT/GC**. The RuO<sub>2</sub> component is shown in dotted-dashed black, the Ru(0) component in dotted black, the envelope in dashed black, the experimental data in solid green and the background signal in solid black.

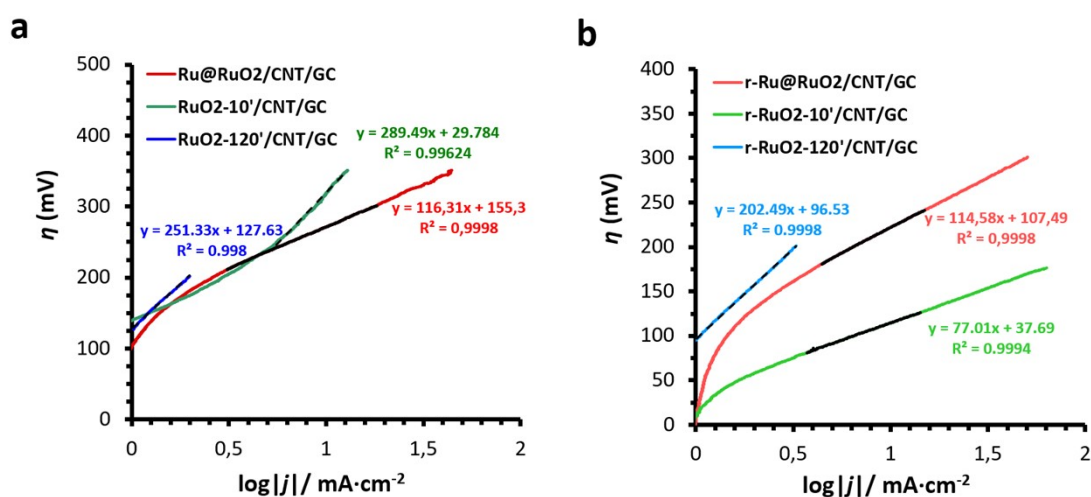

**Figure S7.** Tafel plots in 1 M H<sub>2</sub>SO<sub>4</sub> corresponding to the HER process of **Ru@RuO<sub>2</sub>/CNT/GC** (red), **RuO<sub>2</sub>-10'/CNT/GC** (green) and **RuO<sub>2</sub>-120'/CNT/GC** (blue) (a), and of their reduced counterparts, **r-Ru@RuO<sub>2</sub>/CNT/GC** (orange), **r-RuO<sub>2</sub>-10'/CNT/GC** (light green) and **r-RuO<sub>2</sub>-120'/CNT/GC** (light blue) after a 20 min reductive chronopotentiometry at  $j = -10 \text{ mA}\cdot\text{cm}^{-2}$  (b).

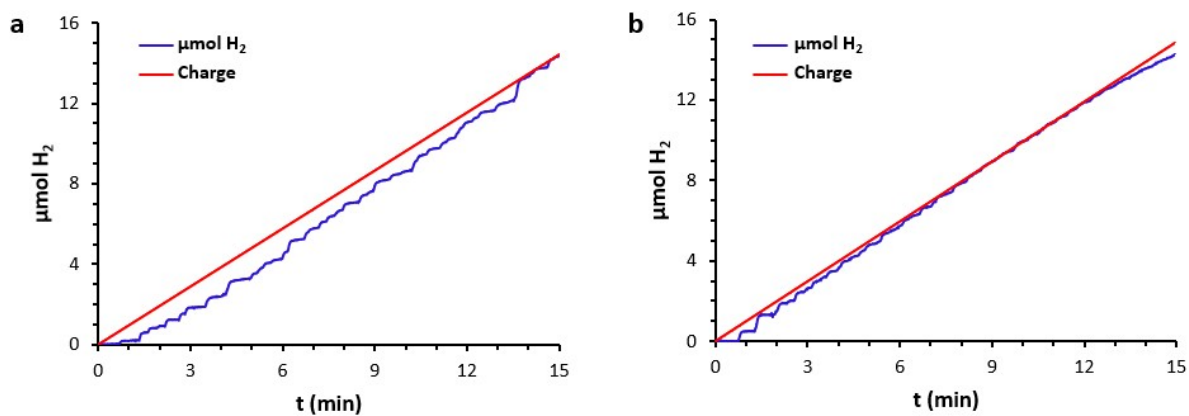

**Figure S8.** H<sub>2</sub> measurement during a reductive CP at -10 mA·cm<sup>-2</sup> for r-Ru@RuO<sub>2</sub>/CNT/FTO (a), and r-RuO<sub>2</sub>-10'/CNT/FTO, (b), in 1 M H<sub>2</sub>SO<sub>4</sub>.

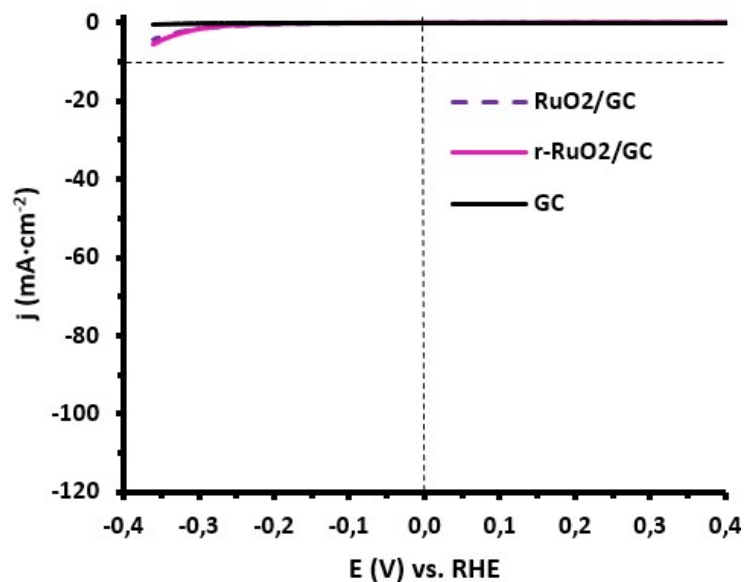

**Figure S9.** LSVs in 1 M H<sub>2</sub>SO<sub>4</sub> of bulk commercial RuO<sub>2</sub>/GC (dashed purple), r-RuO<sub>2</sub>/GC (solid pink) and the bare GC electrode (solid black). The thermodynamic HER potential in 1 M H<sub>2</sub>SO<sub>4</sub> and the reference  $j = -10 \text{ mA}\cdot\text{cm}^{-2}$  current density are indicated as black dashed lines.



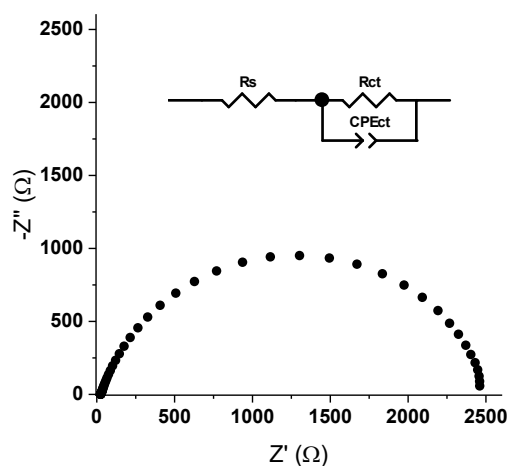

**Figure S10.** Typical Nyquist obtained for the electrodes studied herein. Nyquist plot of **CNT/GC** measured at -0.3 V vs NHE. Inset: Randles circuit employed to fit the experimental data.

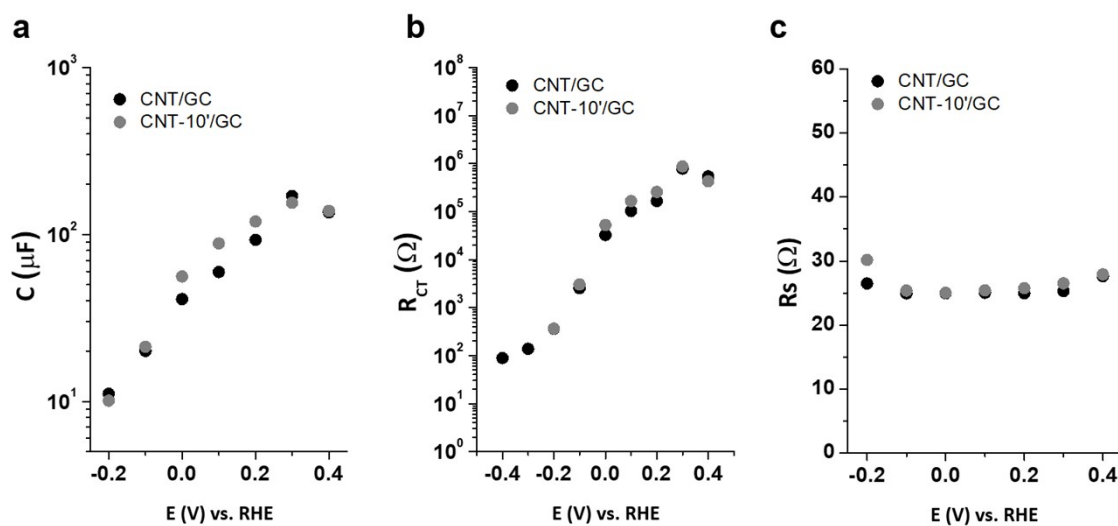

**Figure S11.** Impedance spectroscopy results  $C$ ,  $R_1$  and  $R_s$ , fitting the Nyquist plots to a simple Randles circuit of **CNT/GC** (black) and **CNT-10'/GC** (dark grey). (a) Capacitance ( $C$ ), (b) charge transfer resistance ( $R_{CT}$ ) and (c) series resistance ( $R_s$ ).

**Table S1.** Main physicochemical and electrochemical data of the CNT-supported Ru-based nanomaterials for HER in 1 M H<sub>2</sub>SO<sub>4</sub>.

| <b>Entry</b> | <b>System</b>                                     | <b>NP mean size (nm)</b>                                        | <b>NP composition</b>                        | <b><math>\eta_0</math> (mV)</b> | <b><math>\eta_{10}</math> (mV)</b> | <b><math>b</math> (mV·dec<sup>-1</sup>)</b> |
|--------------|---------------------------------------------------|-----------------------------------------------------------------|----------------------------------------------|---------------------------------|------------------------------------|---------------------------------------------|
| 1            | <b>Ru@RuO<sub>2</sub>/CNT/GC</b>                  | 2.8 ± 0.8                                                       | Ru <sup>0</sup> /RuO <sub>2</sub> core/shell | 200                             | 272                                | 116                                         |
| 2            | <b>r-Ru@RuO<sub>2</sub>/CNT/GC</b> <sup>i</sup>   | ---                                                             | Ru <sup>0</sup> <sup>ii</sup>                | 150                             | 222                                | 115                                         |
| 3            | <b>RuO<sub>2</sub>-10'/CNT/GC</b>                 | 5.3 ± 0.9                                                       | RuO <sub>2</sub>                             | 130                             | 319                                | 289                                         |
| 4            | <b>r-RuO<sub>2</sub>-10'/CNT-/GC</b> <sup>i</sup> | ---                                                             | RuO <sub>2</sub> /Ru <sup>0</sup> core/shell | 50                              | 115                                | 77                                          |
| 5            | <b>RuO<sub>2</sub>-120'/CNT/GC</b>                | Nanorods: broad (6.7 ± 1.5 nm) and long (24.8 ± 5.5 m) crystals | RuO <sub>2</sub>                             | 125                             | -                                  | 251                                         |
| 6            | <b>r-RuO<sub>2</sub>-120'/CNT/GC</b> <sup>i</sup> | ---                                                             | RuO <sub>2</sub>                             | 95                              | -                                  | 202                                         |

<sup>i</sup> These nanomaterials were treated under chronopotentiometry reductive conditions ( $j = -10$  mA·cm<sup>-2</sup>) for 20 min. <sup>ii</sup> The oxidation state is assumed on the basis of literature data (ref. 5).

### 3. Computational studies

$$\theta = 1/N$$

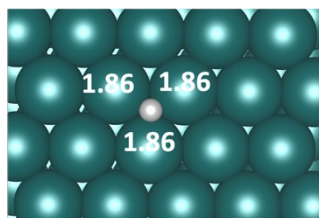

-58.0

**3<sub>Oh</sub>**

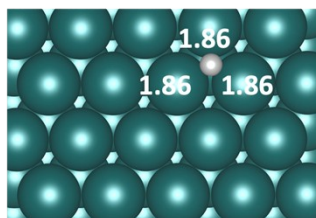

-52.4

**3<sub>Td</sub>**

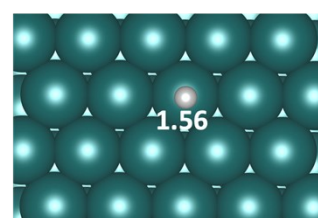

-56.3

**1<sub>Top</sub>**

$$\theta = 1$$

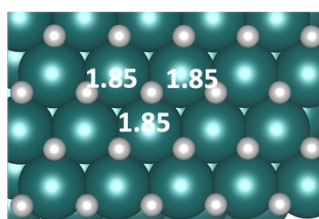

-49.5

**3<sub>Oh</sub>**

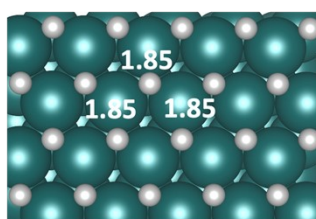

-44.1

**3<sub>Td</sub>**

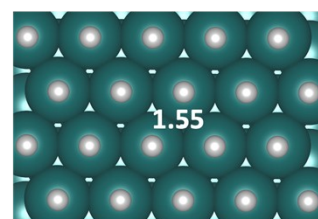

-50.3

**1<sub>Top</sub>**

$$\theta = (N+1)/N$$

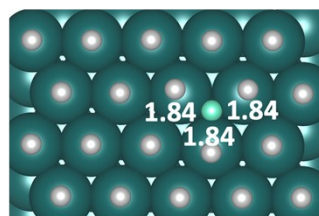

-32.0

**M-3<sub>Oh</sub>**

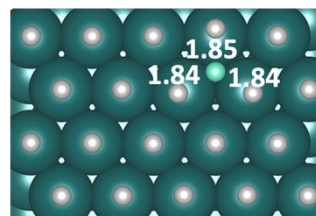

-34.9

**M-3<sub>Td</sub>**

**Figure S12.** Optimized structures and adsorption energies for hydrogen onto a Pt surface as a function of the coverage. The additional hydrogen in the  $\theta = 1$  coverage is represented in pale green. Pt-H distances are in Å and energies in  $\text{kJ}\cdot\text{mol}^{-1}$ .

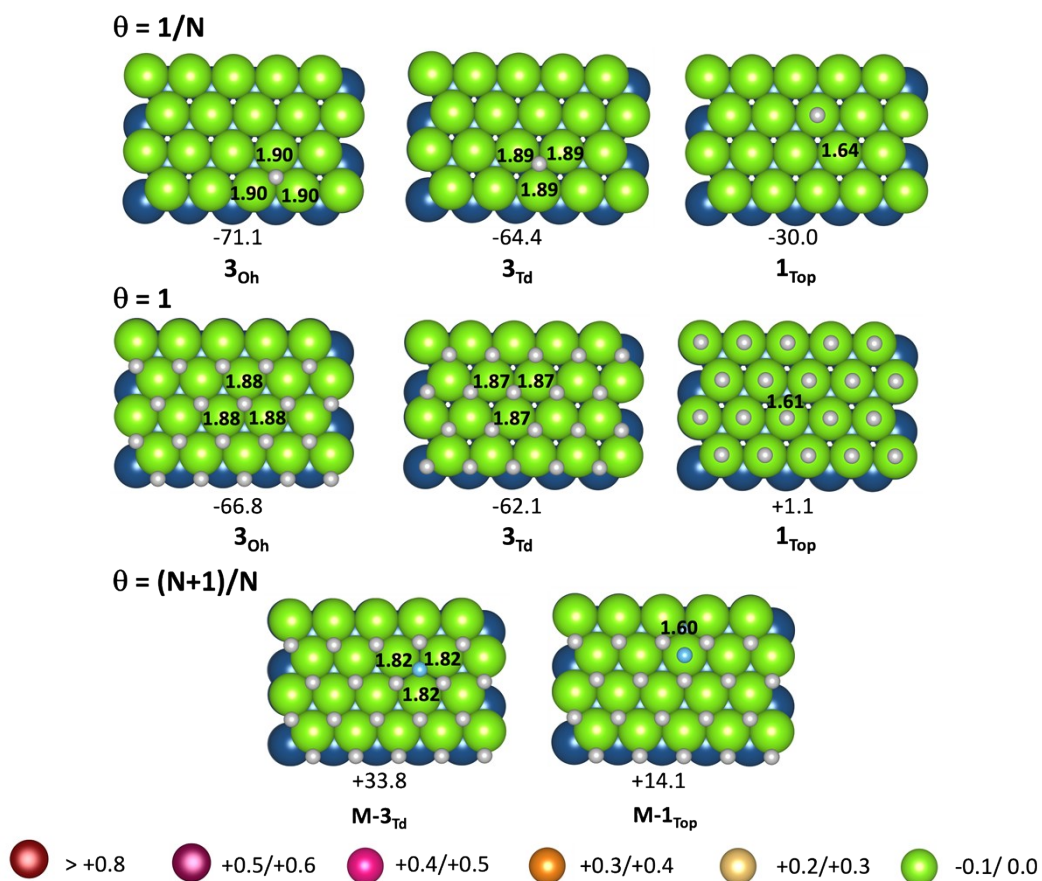

**Figure S13.** Optimized structures and adsorption energies for hydrogen onto a **Ru** surface as a function of the coverage. The additional hydrogen in the  $\theta = 1$  coverage is represented in pale blue. The outermost atom color labeling indicates the atomic Bader charges of the pristine material. Ru-H distances are in Å and energies in  $\text{kJ}\cdot\text{mol}^{-1}$ .

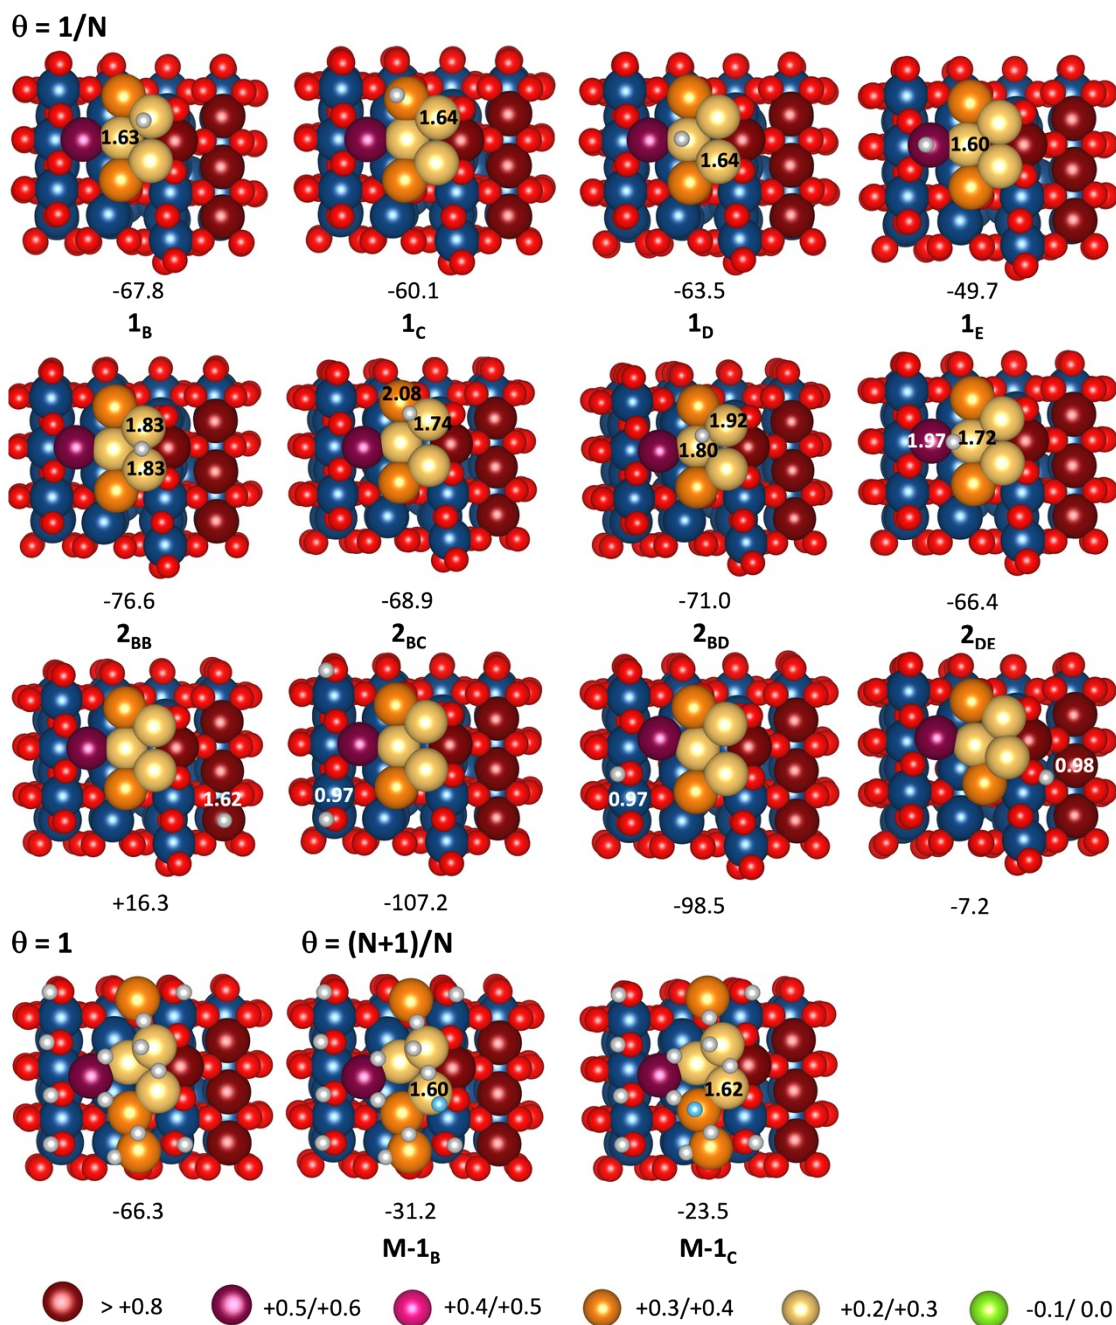

**Figure S14.** Optimized structures and adsorption energies for hydrogen onto a  $\text{RuO}_2@\text{Ru}_7$  model of  $r\text{-RuO}_2\text{-10'}/\text{CNT}/\text{GC}$  as a function of the coverage. The additional hydrogen in the  $\theta = 1$  coverage is represented in pale blue. The outermost atom color labeling indicates the atomic Bader charges of the pristine material. Ru-H distances are in Å and energies in  $\text{kJ}\cdot\text{mol}^{-1}$ .

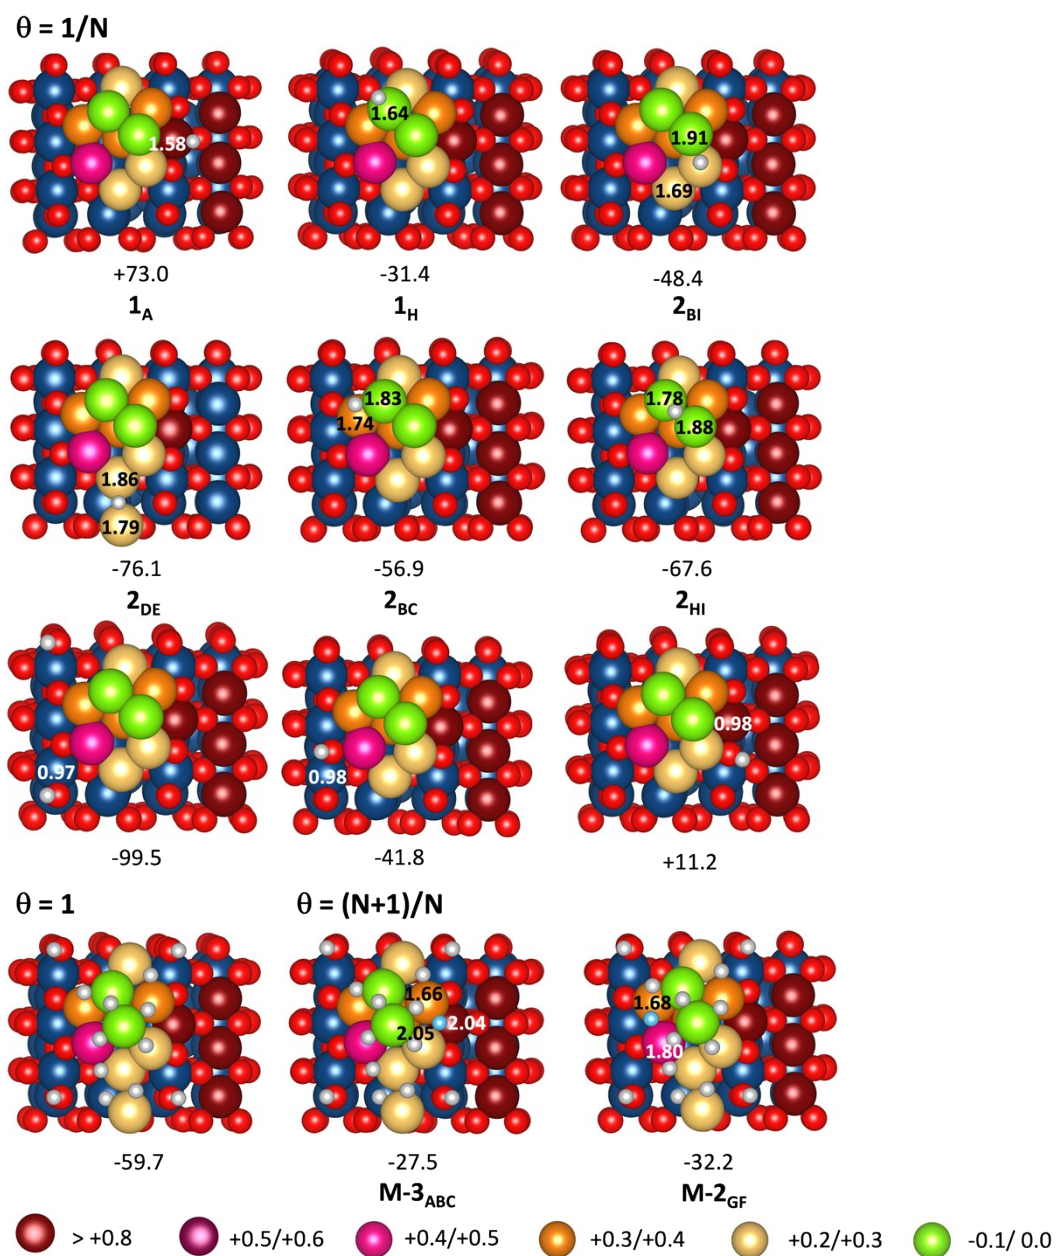

**Figure S15.** Optimized structures and adsorption energies for hydrogen onto a  $\text{RuO}_2@Ru_{10}$  model of  $r\text{-RuO}_2\text{-10'}/\text{CNT}/\text{GC}$  as a function of the coverage. The additional hydrogen in the  $\theta = 1$  coverage is represented in pale blue. The outermost atom color labeling indicates the atomic Bader charges of the pristine material. Ru-H distances are in Å and energies in  $\text{kJ}\cdot\text{mol}^{-1}$ .

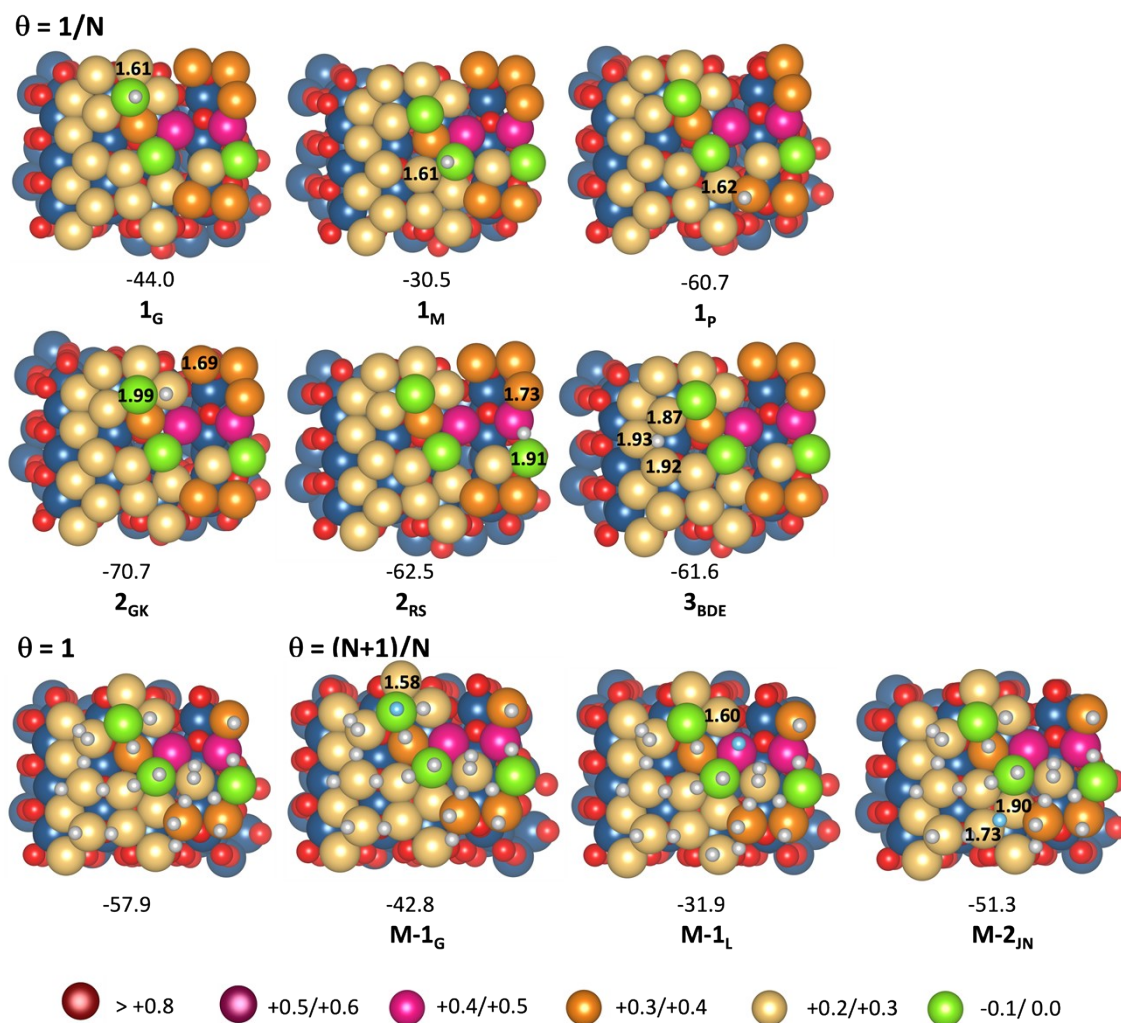

**Figure S16.** Optimized structures and adsorption energies for hydrogen onto a  $\text{RuO}_2@Ru_{20}$  model of  $r\text{-RuO}_2\text{-10'}/\text{CNT}/\text{GC}$  as a function of the coverage. The additional hydrogen in the  $\theta = 1$  coverage is represented in pale blue. The outermost atom color labeling indicates the atomic Bader charges of the pristine material. Ru-H distances are in  $\text{\AA}$  and energies in  $\text{kJ}\cdot\text{mol}^{-1}$ .

**Top view**

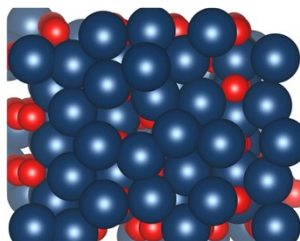

**Side view**

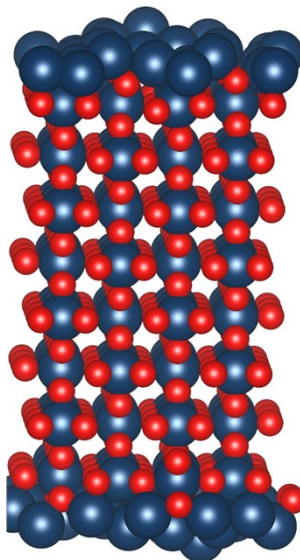

**Figure S17.** RuO<sub>2</sub>@Ru<sub>20</sub> model including eight RuO<sub>2</sub> layers in the core.
